# Supplementary material for: Comparative Whole Genome Sequence Analysis and Biological Features of Clostridioides difficile Sequence Type 2‡
Source: Front Microbiol. 2021 Jul 5;12:651520. doi: 10.3389/fmicb.2021.651520 (PMC8287029; doi:10.3389/fmicb.2021.651520)
Supplement: Supplementary file 1 [file Table_1.XLSX]

## Sheet: Sheet1
Strain	SRA Accession	RefSeq assembly accession	Country	Region	Isolate Date
CD21	SRS369523	GCF_000448745.2	USA	Michigan	2010
DA00306	SRS369592	GCF_000449205.2	USA	Michigan	2010
CD70	SRS369542	GCF_000449225.2	USA	Michigan	2010
CD109	SRS369497	GCF_000449245.2	USA	Michigan	2010
CD144	SRS369506	GCF_000449365.2	USA	Michigan	2010
DA00062	SRS369549	GCF_000449925.2	USA	Michigan	2010
DA00131	SRS369556	GCF_000450045.2	USA	Michigan	2010
DA00232	SRS369584	GCF_000450525.2	USA	Michigan	2010
DA00245	SRS369586	GCF_000450585.2	USA	Michigan	2010
P21	SRS369611	GCF_000450645.2	USA	Pennsylvania	2005
DA00313	SRS369596	GCF_000450705.2	USA	Michigan	2010
Y21	SRS369656	GCF_000450845.2	USA	Pennsylvania	2010
Y401	SRS369668	GCF_000450905.2	USA	Pennsylvania	2010
CD90	SRS369546	GCF_000451205.2	USA	Michigan	2010
P3	SRS369615	GCF_000451565.2	USA	Pennsylvania	2001
P78	SRS369647	GCF_000452045.2	USA	Pennsylvania	2009
P77	SRS369646	GCF_000452205.2	USA	/	2009
DA00130	SRS369555	GCF_000473565.2	USA	Michigan	2010
P33	SRS369619	GCF_000473585.2	USA	Pennsylvania	2009
T42	ERS610816	GCF_000530325.1	Europe	Italy	2012
E14	ERS610821	GCF_000530475.1	Europe	Hungary	2012
E24	ERS610840	GCF_000531315.1	Europe	France	2012
LIBA-5784	/	GCF_000828245.1	/	Costa Rica:San Jose	2009
08ACD0030	SRS839443	GCF_001577795.1	Canada	Ontario	2005
01A09CD0020	SRS2503809	GCF_001939005.1	Canada	/	2009
20111144	/	GCF_001971985.1	USA	missing	2011
20120956	/	GCF_001972135.1	USA	missing	2012
5486-Y/ST2	/	GCF_002301015.1	USA	Chicago	2012
5497-Y/ST2	/	GCF_002301235.1	USA	Chicago	2013
5503-Y/ST2	/	GCF_002301265.1	USA	Chicago	2013
5505-Y/ST2	/	GCF_002301395.1	USA	Chicago	2013
5542-Y/ST2	/	GCF_002301455.1	USA	Chicago	2013
5548-Y/ST2	/	GCF_002301495.1	USA	Chicago	2013
5539-Y/ST2	/	GCF_002301705.1	USA	Chicago	2013
7451-NonSp/ST2	/	GCF_002302055.1	USA	Chicago	41483
7453-Y/ST2	/	GCF_002302075.1	USA	Chicago	41505
7472-Y/ST2	/	GCF_002302725.1	USA	Chicago	41531
7476-Y/ST2	/	GCF_002302805.1	USA	Chicago	41534
7503-Y/ST2	/	GCF_002303185.1	USA	Chicago	41592
7505-Y/ST2	/	GCF_002303215.1	USA	Chicago	41599
6603-Y/ST2	/	GCF_002303225.1	USA	Chicago	41393
6625-Y/ST2	/	GCF_002303605.1	USA	Chicago	2013
W0022a	/	GCF_002812625.1	USA	NY	2014
4380229	/	GCF_002940845.1	China	Hongkong	2009
HS-FS_0042_01	SRS3049588	GCF_003013435.1	USA	Arizona	2016
CD105HS6	ERS515331	GCF_900002425.1	UK	/	2014
CD105HS22	ERS515341	GCF_900002475.1	UK	/	2014
CD105HE1	ERS661431	GCF_900005755.1	UK	/	2015
VL_0279	ERS971418	GCF_900007695.1	Canada	Quebec	2015
VL_0028	ERS971167	GCF_900008335.1	Canada	Quebec	2015
VL_0165	ERS971304	GCF_900008455.1	Canada	Quebec	2015
VL_0303	ERS971442	GCF_900008535.1	Canada	Quebec	2015
VL_0342	ERS971481	GCF_900008565.1	Canada	Quebec	2015
VL_0376	ERS971515	GCF_900008595.1	Canada	Quebec	2015
VL_0430	ERS971569	GCF_900009245.1	Canada	Quebec	2015
VL_0346	ERS971485	GCF_900009435.1	Canada	Quebec	2015
VL_0029	ERS971279	GCF_900010345.1	Canada	Quebec	2015
VL_0029	ERS971168	GCF_900010855.1	Canada	Quebec	2015
VL_0111	ERS971250	GCF_900010905.1	Canada	Quebec	2015
VL_0091	ERS971230	GCF_900011085.1	Canada	Quebec	2015
VL_0175	ERS971314	GCF_900011095.1	Canada	Quebec	2015
VL_0172	ERS971311	GCF_900011505.1	Canada	Quebec	2015
VL_0427	ERS971566	GCF_900011725.1	Canada	Quebec	2015
VL_0031	ERS971170	GCF_900011805.1	Canada	Quebec	2015
VL_0064	ERS971203	GCF_900011835.1	Canada	Quebec	2015
VL_0065	ERS971204	GCF_900011845.1	Canada	Quebec	2015
VL_0100	ERS971239	GCF_900011995.1	Canada	Quebec	2015
VL_0159	ERS971298	GCF_900012255.1	Canada	Quebec	2015
VL_0233	ERS971372	GCF_900013125.1	Canada	Quebec	2015
VL_0348	ERS971487	GCF_900013375.1	Canada	Quebec	2015
VL_0252	ERS971391	GCF_900013695.1	Canada	Quebec	2015
VL_0262	ERS971401	GCF_900013765.1	Canada	Quebec	2015
VL_0288	ERS971427	GCF_900013865.1	Canada	Quebec	2015
VL_0309	ERS971448	GCF_900013925.1	Canada	Quebec	2015
VL_0320	ERS971459	GCF_900013965.1	Canada	Quebec	2015
VL_0372	ERS971511	GCF_900014185.1	Canada	Quebec	2015
VL_0073	ERS971212	GCF_900014405.1	Canada	Quebec	2015
VL_0366	ERS971505	GCF_900014465.1	Canada	Quebec	2015
VL_0377	ERS971516	GCF_900014475.1	Canada	Quebec	2015
VL_0399	ERS971538	GCF_900014575.1	Canada	Quebec	2015
VL_0441	ERS971580	GCF_900014715.1	Canada	Quebec	2015
VL_0442	ERS971581	GCF_900014725.1	Canada	Quebec	2015
VL_0453	ERS971592	GCF_900014735.1	Canada	Quebec	2015
VL_0463	ERS971602	GCF_900014785.1	Canada	Quebec	2015
VL_0038	ERS971177	GCF_900014855.1	Canada	Quebec	2015
VL_0041	ERS971180	GCF_900015095.1	Canada	Quebec	2015
VL_0098	ERS971237	GCF_900015225.1	Canada	Quebec	2015
VL_0332	ERS971471	GCF_900015275.1	Canada	Quebec	2015
VL_0006	ERS971145	GCF_900015525.1	Canada	Quebec	2015
VL_0195	ERS971334	GCF_900015625.1	Canada	Quebec	2015
VL_0367	ERS971506	GCF_900015665.1	Canada	Quebec	2015
VL_0367	ERS971506	GCF_900015665.1	Canada	Quebec	2015
VL_0310	ERS971449	GCF_900016315.1	Canada	Quebec	2015
VL_0296	ERS971435	GCF_900019295.1	Canada	Quebec	2015
CD105HS32	ERS1339499	GCF_900095995.1	UK	/	2016
CD105HS34	ERS1339501	GCF_900096135.1	UK	/	2016
CD105HS42	ERS1339509	GCF_900096245.1	UK	/	2016
CD105HS22	ERS1339525	GCF_900096305.1	UK	/	2016
CD105HS6	ERS1339526	GCF_900096355.1	UK	/	2016
CD105LC15	ERS1339550	GCF_900096435.1	UK	/	2016
CD105LC14	ERS1339549	GCF_900096455.1	UK	/	2016
VRECD0132	ERS717009	GCF_900164015.1	UK	/	2014
VRECD0141	ERS717018	GCF_900164085.1	UK	/	2014
VRECD0138	ERS717015	GCF_900164105.1	UK	/	2014
VRECD0160	ERS717035	GCF_900164185.1	UK	/	2014
VRECD0140	ERS717017	GCF_900164215.1	UK	/	2014
VRECD0012	ERS716896	GCF_900164585.1	UK	/	2014
VRECD0011	ERS716916	GCF_900164695.1	UK	/	2014
VRECD0052	ERS716939	GCF_900164805.1	UK	/	2014
VRECD0054	ERS716941	GCF_900164845.1	UK	/	2014
VRECD0074	ERS716959	GCF_900164855.1	UK	/	2014
VRECD0086	ERS716968	GCF_900164925.1	UK	/	2014
VRECD0099	ERS716975	GCF_900164955.1	UK	/	2014
VRECD0103	ERS716979	GCF_900164985.1	UK	/	2014
VRECD0144	ERS717021	GCF_900165095.1	UK	/	2014
VRECD0147	ERS717024	GCF_900165125.1	UK	/	2014
VRECD0149	ERS717026	GCF_900165145.1	UK	/	2014
VRECD0150	ERS717027	GCF_900165155.1	UK	/	2014
VRECD0157	ERS717033	GCF_900165215.1	UK	/	2014
VRECD0089	ERS717057	GCF_900165245.1	UK	/	2014
VRECD0090	ERS717058	GCF_900165255.1	UK	/	2014
VRECD0158	ERS717065	GCF_900165295.1	UK	/	2014
VRECD0024	ERS716913	GCF_900165505.1	UK	/	2014
VRECD0017	ERS716911	GCF_900165515.1	UK	/	2014
VRECD0057	ERS716944	GCF_900165645.1	UK	/	2014
VRECD0061	ERS716951	GCF_900165715.1	UK	/	2014
VRECD0093	ERS716970	GCF_900165795.1	UK	/	2014
VRECD0097	ERS716973	GCF_900165825.1	UK	/	2014
CD65	ERS368510	GCF_900165945.1	UK	/	2014
CD06	ERS368451	GCF_900166045.1	UK	/	2014
CD68	ERS368513	GCF_900166095.1	UK	/	2014
CD32	ERS368477	GCF_900166145.1	UK	/	2014
CD07	ERS368452	GCF_900166235.1	UK	/	2014
CD18	ERS368463	GCF_900166365.1	UK	/	2014
CD31	ERS368476	GCF_900166385.1	UK	/	2014
CD48	ERS368493	GCF_900166415.1	UK	/	2014
CD37	ERS368482	GCF_900166435.1	UK	/	2014
CD13	ERS368458	GCF_900166465.1	UK	/	2014
CD70	ERS368515	GCF_900166525.1	UK	/	2014
CDP021	SRX7203188	/	South Korea	Busan	2014
AUS2	SRX7203178	/	Australia	Sydney	2014
AUS62	SRX7203185	/	Australia	Sydney	2015
890	SRX7203243	/	China	Zhejiang	2014
LE149	SRX7203291	/	China	Zhejiang	2017
S664	SRX7203311	/	China	Zhejiang	2014
SI68	SRX7203321	/	Singapore	/	2013
SI69	SRX7203322	/	Singapore	/	2013
25	SRX7203180	/	China	Zhejiang	2013
HB412	SRX7203252	/	China	Hebei	2014
WA1024	SRX7203339	/	Australia	Perth	2012
S993	SRX7203316	/	China	Zhejiang	2016
JAP18	SRX7203273	/	Japan	/	2017
JE12	SRX7203282	/	China	Zhejiang	2017
YZ273	SRX7203355	/	China	Zhejiang	2017
HB14	SRX7203235	/	China	Hebei	2011
HB18	SRX7203242	/	China	Hebei	2011
HB222	SRX7203244	/	China	Hebei	2012
HB224	SRX7203245	/	China	Hebei	2012
HB276	SRX7203248	/	China	Hebei	2013
HB417	SRX7203253	/	China	Hebei	2014
HB552	SRX7203256	/	China	Hebei	2014
HB592	SRX7203202	/	China	Hebei	2014
HB648	SRX7203205	/	China	Hebei	2014
HN1000	SRX7203259	/	China	Hunan	2014
HN1040	SRX7203260	/	China	Hunan	2014
4-37	SRX7203170	/	China	Zhejiang	2013
SR59	SRX7203326	/	China	Zhejiang	2017
s11	SRX7203299	/	China	Zhejiang	2013
S457	SRX7203308	/	China	Zhejiang	2014
s750	SRX7203314	/	China	Zhejiang	2015
XS4	SRX7203349	/	China	Zhejiang	2014
XS76	SRX7203350	/	China	Zhejiang	2014
XS152	SRX7203346	/	China	Zhejiang	2014
HK05	SRX7203213	/	China	Hongkong	2014
HK44	SRX7203255	/	China	Hongkong	2014
JES162	SRX7203288	/	China	Zhejiang	2017
SI64	SRX7203319	/	Singapore	/	2014
YZ438	SRX7203358	/	China	Zhejiang	2017
658	/	/	China	Zhejiang	2013
